# Supplementary material
Source: PubMed Central journal article supplement (PMC3471091)
Supplement: NIHMS406920-supplement-Supp_1.pdf [file NIHMS406920-supplement-Supp_1.pdf]

## **Supplementary data**

Fig. S1. NIH 3T3 cells deficient in SelT are sensitive to trypsin treatment. Cells grown to confluency were treated with trypsin-EDTA and images recorded with an inverted phase contrast microscope after 1 and 2 min following treatment. The panels show results of SelT knockdown and control cells. Similar results were obtained for the two SelT knockdown cells lines (siSelT-1 and siSelT-5).
