# Supplementary material
Source: PubMed Central journal article supplement (PMC3471091)

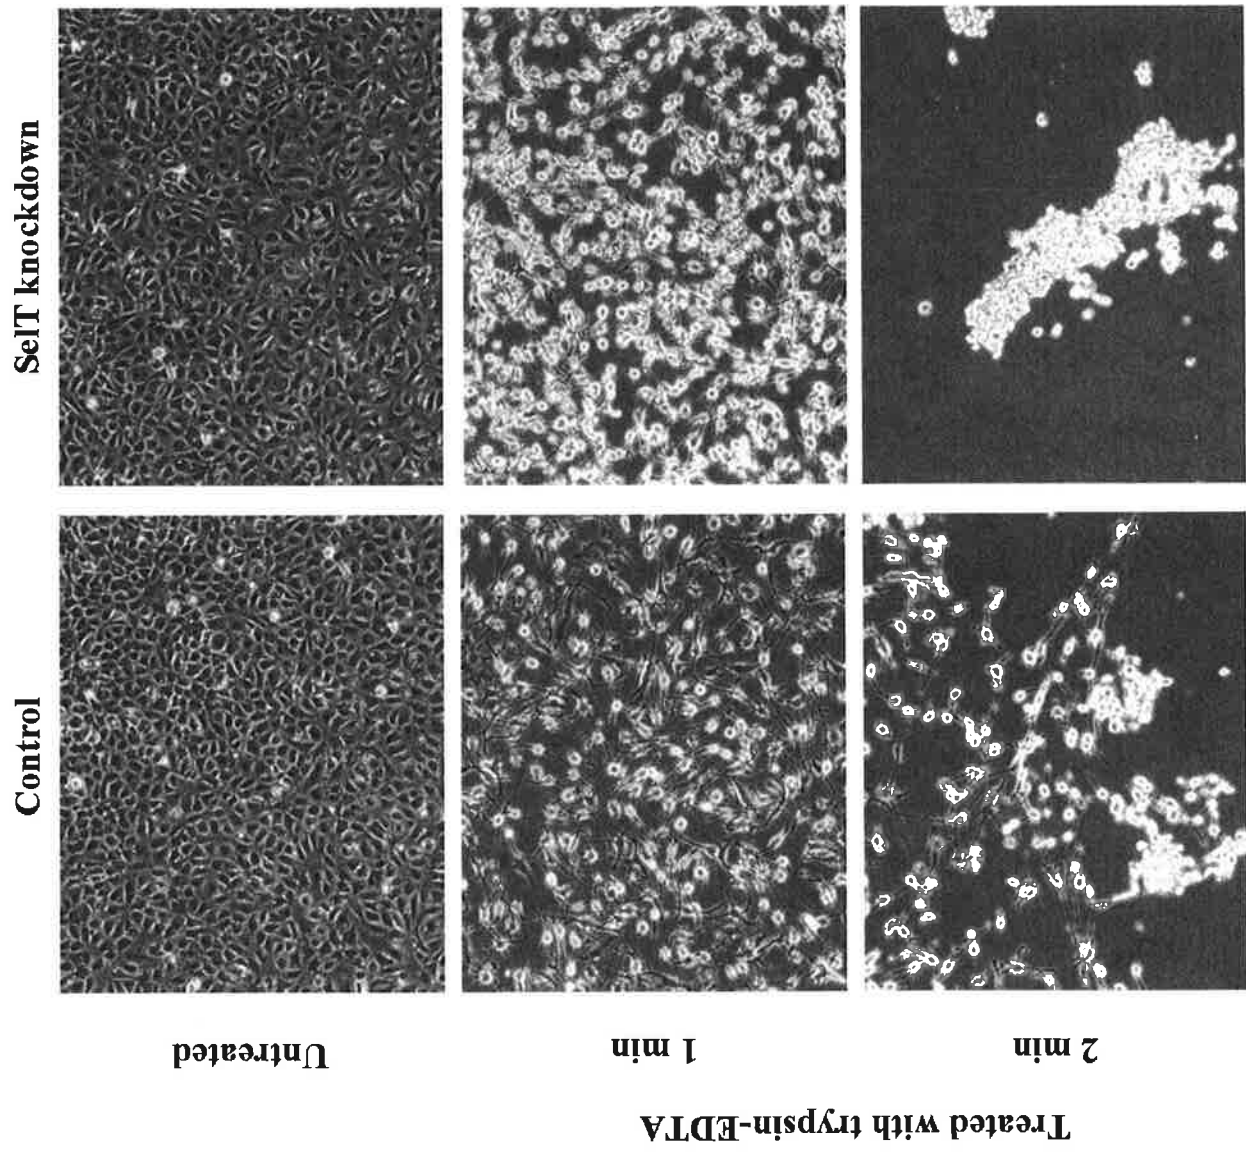

**Fig. S1**

Supplement: NIHMS406920-supplement-Supp_2.pdf [file NIHMS406920-supplement-Supp_2.pdf]
